# Supplementary material
Source: MDPI journal article supplement (https://www.mdpi.com/2076-3417/11/21/9856)

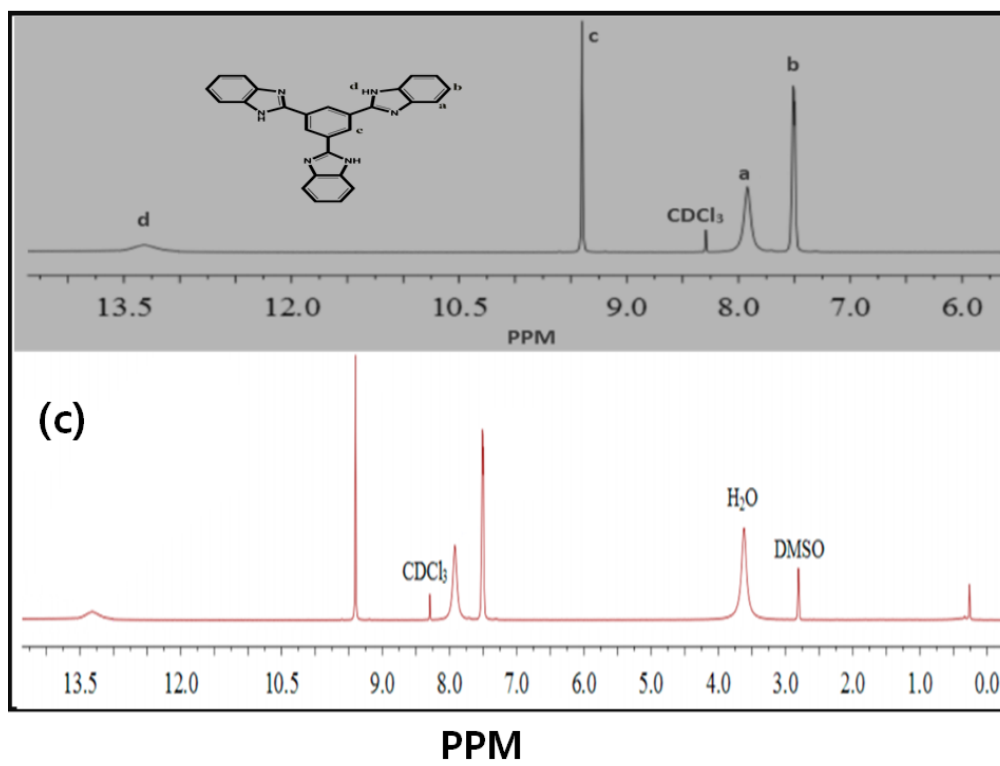

**Figure S1** NMR spectra of TIBM linker

Supplement: s1 [file s1]
